# Supplementary material for: Structure of the NDH-2 – HQNO inhibited complex provides molecular insight into quinone-binding site inhibitors
Source: PubMed Central journal article supplement (PMC6167311; doi:10.1016/j.bbabio.2018.03.014), 2018-07
Supplement: mmc2.pdf [file mmc2.pdf]

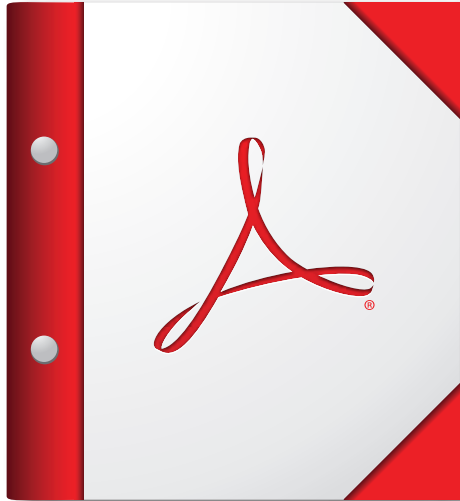

**For the best experience, open this PDF portfolio in  
Acrobat 9 or Adobe Reader 9, or later.**

[Get Adobe Reader Now!](#)
